# Supplementary material for: Pricing and Collection Rate for Remanufacturing Industry considering Capacity Constraint in Recycling Channels
Source: Hindawi journal article supplement (doi:10.1155/2020/8391252), 2020-06-11
Supplement: f1 [file 8391252.f1.docx]

**Appendix for Proposition 1**

Based on the second-order derivates of profit function for supply chain, we obtain the Hessian matrix with respect to the selling price and collection rates is

|  |  | (1) |
| --- | --- | --- |

Obviously, if the scaling parameter for collection cost in recycling channel is relatively small, the Hessian matrix is not negative define. Thus, the collection rates for manufacturer and retailer are as , namely neither the member recycles the used products to remanufacturing. In this case, this next study has no sense. Therefore, the Hessian matrix is a negative define under some circumstance . Based on the assumption, we have , and . Hence, the Hessian matrix of supply chain profit is a negative define. Next, we introduce Karush–Kuhn–Tucker conditions to characterize the optimality condition and model a Lagrangian function of optimization problem can be expressed as , where , and is the multipliers corresponding to slack variables. Further, the optimal decisions with eight cases are discussed as following:

**Case 1**: ,, indicates that the recycling quantities from the manufacturer and retailer don’t exceed capacity constraints, which part of used products returns remanufacturing (**N-N-P Strategy**). Equating the first-order conditions to zero and solving the KKT conditions, we have , , .

**Case 2**:,, indicates that the recycling quantities from the manufacturer and retailer don’t exceed capacity constraints, which full of used products returns remanufacturing (**N-N-F Strategy**). Equating the first-order conditions to zero and solving the KKT conditions, we have , , .

**Case 3**: , , indicates that the recycling quantity from the manufacturer exceeds capacity constraint and that of retailer doesn’t exceed, which part of used products returns remanufacturing (**N-Y-P Strategy**). Equating the first-order conditions to zero and solving the KKT conditions, we have , , .

**Case 4**: , , indicates that the recycling quantity from the manufacturer exceeds capacity constraint and that of retailer doesn’t exceed, which part of used products returns remanufacturing (**N-Y-F Strategy**). Equating the first-order conditions to zero and solving the KKT conditions, we have , , .

**Case 5**: , , indicates that the recycling quantity from the manufacturer doesn’t exceed capacity constraint and that of retailer exceeds, which part of used products returns remanufacturing (**Y-N-P Strategy**). Equating the first-order conditions to zero and solving the KKT condition, we can obtain , , .

**Case 6**: , , indicates that the recycling quantity from the manufacturer doesn’t exceed capacity constraint and that of retailer exceeds, which full of used products returns remanufacturing (**Y-N-F Strategy**). Equating the first-order conditions to zero and solving the KKT conditions, we have , , .

**Case 7**:,, indicates that the recycling quantities from the manufacturer and the retailer exceed capacity constraint, which part of used products returns remanufacturing (**Y-Y-P Strategy**). Equating the first-order conditions to zero and solving the KKT conditions, we have , , .

**Case 8**:,, indicates that the recycling quantities from the manufacturer and the retailer exceed capacity constraint, which full of used products returns remanufacturing (**Y-Y-F Strategy**). Equating the first-order conditions to zero and solving the KKT conditions, we have , , .

**Appendix for Proposition 2**

In the decentralized scenario, we introduce the backward induction to solve the above model. From the second stage, given , and , the retailer determines the selling price and collection rate to maximize profit. According to Formula(3), the Hessian matrix can be obtained as following

|  |  | (2) |
| --- | --- | --- |

The second derivate of Hessian matrix with respect to the selling price and collection rate are and . According to the assumptions, the Hessian matrix is negative definite. Therefore, the retailer’s profit is a jointly concave function in the selling price and collection rate. And then, we can introduce Karush–Kuhn–Tucker conditions to characterize the optimality condition. Thus, the Lagrangian function of optimization problem in retailer’s profit function can be expressed as , where is the multiplier. Next, we can discuss the optimal retailer’s decisions with two cases as following:

a. when and indicates the recycling quantity from retailer doesn’t exceed the capacity constraint. Combining and solving the KKT conditions, we easily obtain and . Substituting the values of and into the manufacturer’s profit, existing literature (Hong et al., 2015; Huang et al., 2013 and Liu et al., 2017) have proved increases with the increasing of . Hence, the manufacturer maximizes the profit to obtain transfer price, which equals to the upper bound . In addition, the Hessian matrix for manufacturer’s profit function can be obtained as following

|  |  | (3) |
| --- | --- | --- |

The second derivate of Hessian matrix with respect to wholesale price and collection rate are as and . According to the assumptions, the Hessian matrix is negative definite and the manufacturer’s profit is a jointly concave function in the wholesale price and collection rate. Meanwhile, we consider that the Lagrangian function to maximize the manufacturer’s profit as , where and are the multiplier. Further, we know the following strategies:

**Case 1:** and , namely and . Under this situation, it means that the recycling quantity from manufacturer doesn’t exceed the capacity constraint; part of used product returns remanufacturing (**N-N-P Strategy**). Equating first-order conditions to zero, and .

**Case 2:**  and , namely and . Under this situation, it means that the recycling quantity from manufacturer doesn’t exceed the capacity constraint, full of used product returns remanufacturing (**N-N-F Strategy**). Equating first-order conditions to zero, and
.

**Case 3:** and , namely and . Under this situation, it means that the recycling quantity from manufacturer exceeds the capacity constraint; part of used product returns remanufacturing (**N-Y-P Strategy**). Equating first-order conditions, and .

**Case 4:** and , namely and . Under this situation, it means that the recycling quantity from manufacturer exceeds the capacity constraint; full of used product returns remanufacturing (**N-Y-F Strategy**). Equating first-order conditions to zero, and .

b. when and indicates the recycling quantity from retailer exceeds the capacity constraint. Combining and solving the KKT conditions, we can easily have
 and . Substituting the values of and into the manufacturer’s profit, the Hessian matrix for manufacturer’s profit function can be obtained as following

|  |  | (4) |
| --- | --- | --- |

The second derivate of Hessian matrix with respect to the wholesale price and collection rate are and . Hence, the Hessian matrix is negative definite and the manufacturer’s profit is a jointly concave function in the wholesale price and collection rate. Further, the Lagrangian function to maximize the manufacturer’s profit as , where and are the multiplier. Further, we know the following strategies:

**Case 5:**  and , namely and . Under this situation, it means that the recycling quantity from manufacturer doesn’t exceed the capacity constraint; part of used product returns remanufacturing (**Y-N-P Strategy**). Equating the first-order conditions to zero, we have and .

**Case 6:** and , namely and . Under this situation, it means that the recycling quantity from manufacturer doesn’t exceed the capacity constraint, full of used product returns remanufacturing (**Y-N-F Strategy**). Equating the first-order conditions to zero, and .

**Case 7:** and , namely and . Under this situation, it means that the recycling quantity from manufacturer exceeds the capacity constraint; part of used product returns remanufacturing (**Y-Y-P Strategy**). Equating the first-order conditions to zero, and .

**Case 8:** and , namely and . Under this situation, it means that the recycling quantity from manufacturer exceeds the capacity constraint; full of used product returns remanufacturing (**Y-Y-F Strategy**). Equating the first-order conditions to zero, and .

**Appendix for Proposition 4**

For given the collection rate , the optimization problem for manufacturer is to maximize the own profit with the wholesale price, transfer price and collection rate. Obviously, increases with the growth of . Therefore, the manufacturer maximizes the profit to obtain transfer price, which equals to the upper bound . In addition, the manufacturer’s profit is a jointly concave function in the wholesale price and collection rate. By solving the first-order conditions and , we obtain the optimal decisions. Substituting , and into the profit function, it’s easily found that and . Only when the condition and is satisfied can a win-win outcome be attained. Comparing the profits in the centralized scenario and decentralized scenario, we have the fixed fee must be in the range of .

In addition, the bargaining interaction between manufacturer and retailer is a Pareto efficient solution to the distribution the profit in the total supply chain, which’s interpreted as a relationship that determines a unique outcome for the bargaining powers (Chen et al., 2018 and Xu et al., 2018b). As explained in the above, we assume this problem is a pair , where and . In this Nash bargaining game, denotes a set of the the possible solution through agreements and are the disagreement points only when the members fail to achieve agreement. Considering the incentive compatibility constraint, we need to guarantee that . Then, supposing that and are respectively the bargaining powers for manufacturer and retailer, which . According to the leader and follower in Stackelberg game, it exists that and . Therefore, for any , the unique solution to the optimal maximization problem for bargaining is , . Further, we establish the model as following

|  |  | (6) | |
| --- | --- | --- | --- |
| where , | | |

From the above, the equation and should be satisfied. Accordingly, we obtain the fixed fee as .
